# Supplementary material for: Methods for Systematic Identification of Membrane Proteins for Specific Capture of Cancer-Derived Extracellular Vesicles
Source: PubMed Central journal article supplement — Cell Rep. Author manuscript; Available in PMC 2019 May 21. (PMC6528836; doi:10.1016/j.celrep.2019.03.003), 2019-04-02
Supplement: NIHMS1526172-supplement-1.pdf [file NIHMS1526172-supplement-1.pdf]

**Cell Reports, Volume 27**

## **Supplemental Information**

### **Methods for Systematic Identification of Membrane**

### **Proteins for Specific Capture**

### **of Cancer-Derived Extracellular Vesicles**

**Mikołaj Piotr Zaborowski, Kyunghoon Lee, Young Jeong Na, Alessandro Sammarco, Xuan Zhang, Marcin Iwanicki, Pike See Cheah, Hsing-Ying Lin, Max Zinter, Chung-Yu Chou, Giulia Fulci, Bakhos A. Tannous, Charles Pin-Kuang Lai, Michael J. Birrer, Ralph Weissleder, Hakho Lee, and Xandra O. Breakefield**

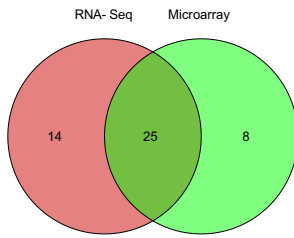

**Figure S1. Number of common membrane proteins depending on the type of input RNA data. Related to Figure 1.** Number of identified membrane proteins with the highest difference between tumor and normal tissues depending on the type of input transcriptome data (microarray or RNA-Seq).

OVCAR5

A2780

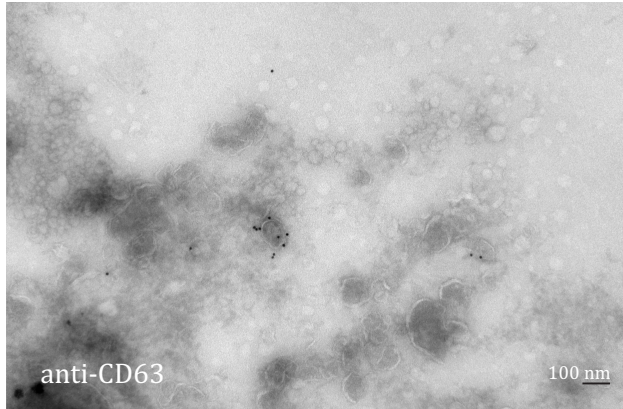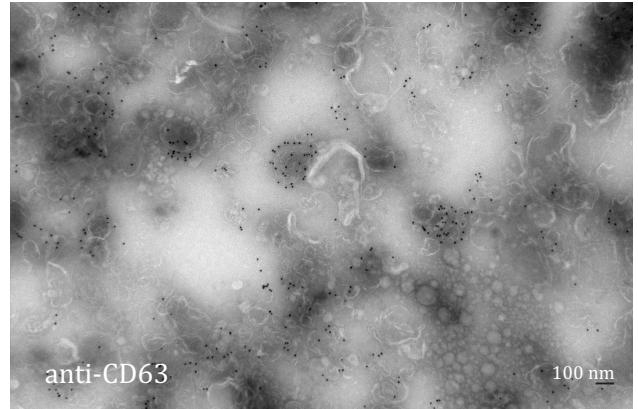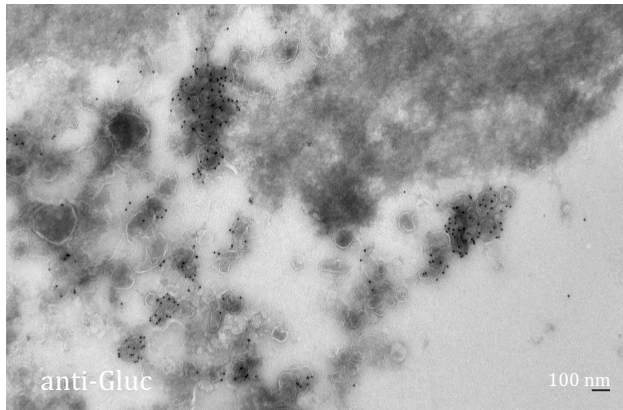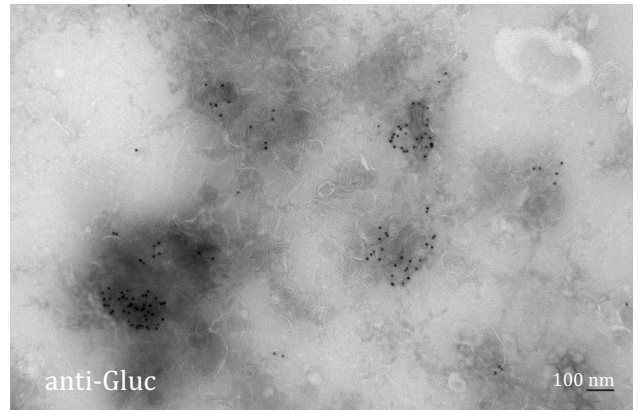

**Figure S2. Transmission electron micrographs of EVs. Related to Figure 3.**

Transmission electron micrographs. EVs were isolated by ultracentrifugation ( $100,000 \times g$ , 2 hr) from OVCAR5 and A2780 cells and immunolabeled with anti-CD63 and anti-Gluc. Scale bar 100 nm.

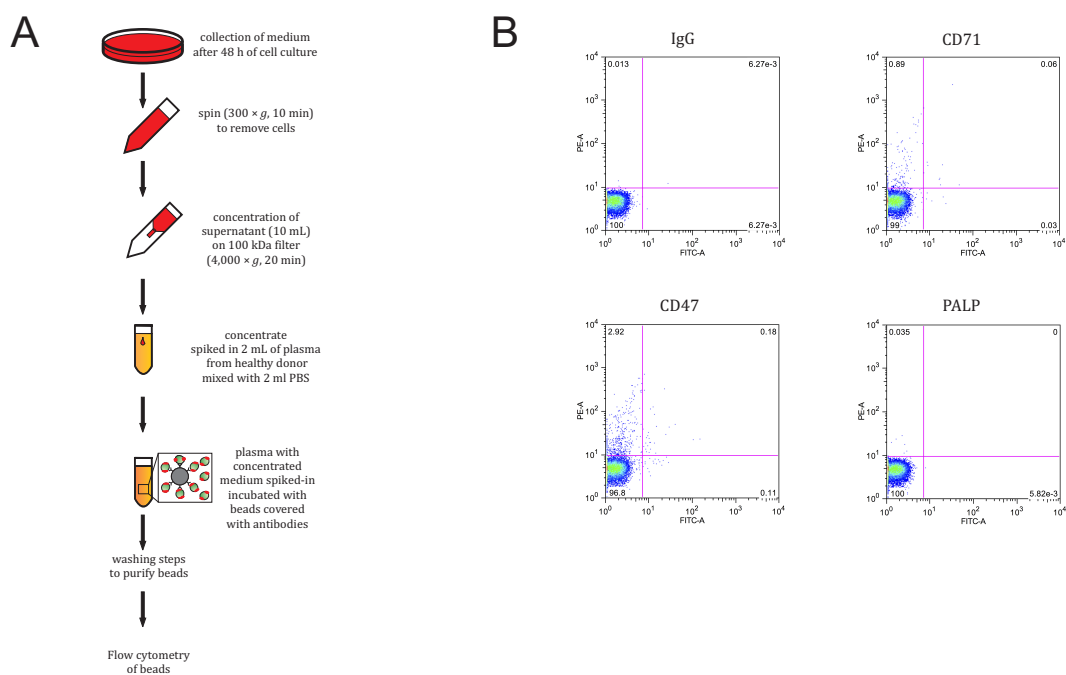

**Figure S3. Analysis of cancer-derived EVs spiked-in human plasma. Related to Figure 5.**

**(A)** Schematic of the experiment to test whether EVs extracted from conditioned medium and spiked-in human plasma can be isolated using anti-CD47, CD71 and PALP antibodies. **(B)** Flow cytometry of the beads covered with antibodies against CD71, CD47, PALP and IgG incubated with human plasma with spiked-in EVs derived from palmtDTomato-expressing Kuramochi cells (charts representative of 2 experiments, each with 3 replicates).
